# Supplementary material for: Divergent ecological histories of two sister Antarctic krill species led to contrasted patterns of genetic diversity in their heat‐shock protein (hsp70) arsenal
Source: PubMed Central journal article supplement (PMC4775515; doi:10.1002/ece3.1989), 2016-02-09

Mismatch curves for each hsp 70 locus (A paralog ; B paralog ; C paralog) for the *Euphausia crystallorophias* species. Observed frequencies follow the black line whereas theoretical values are represented by grey lines (dashed lines: constant model; no variation of the population size and continuous line: growth model; population with a growing population size)

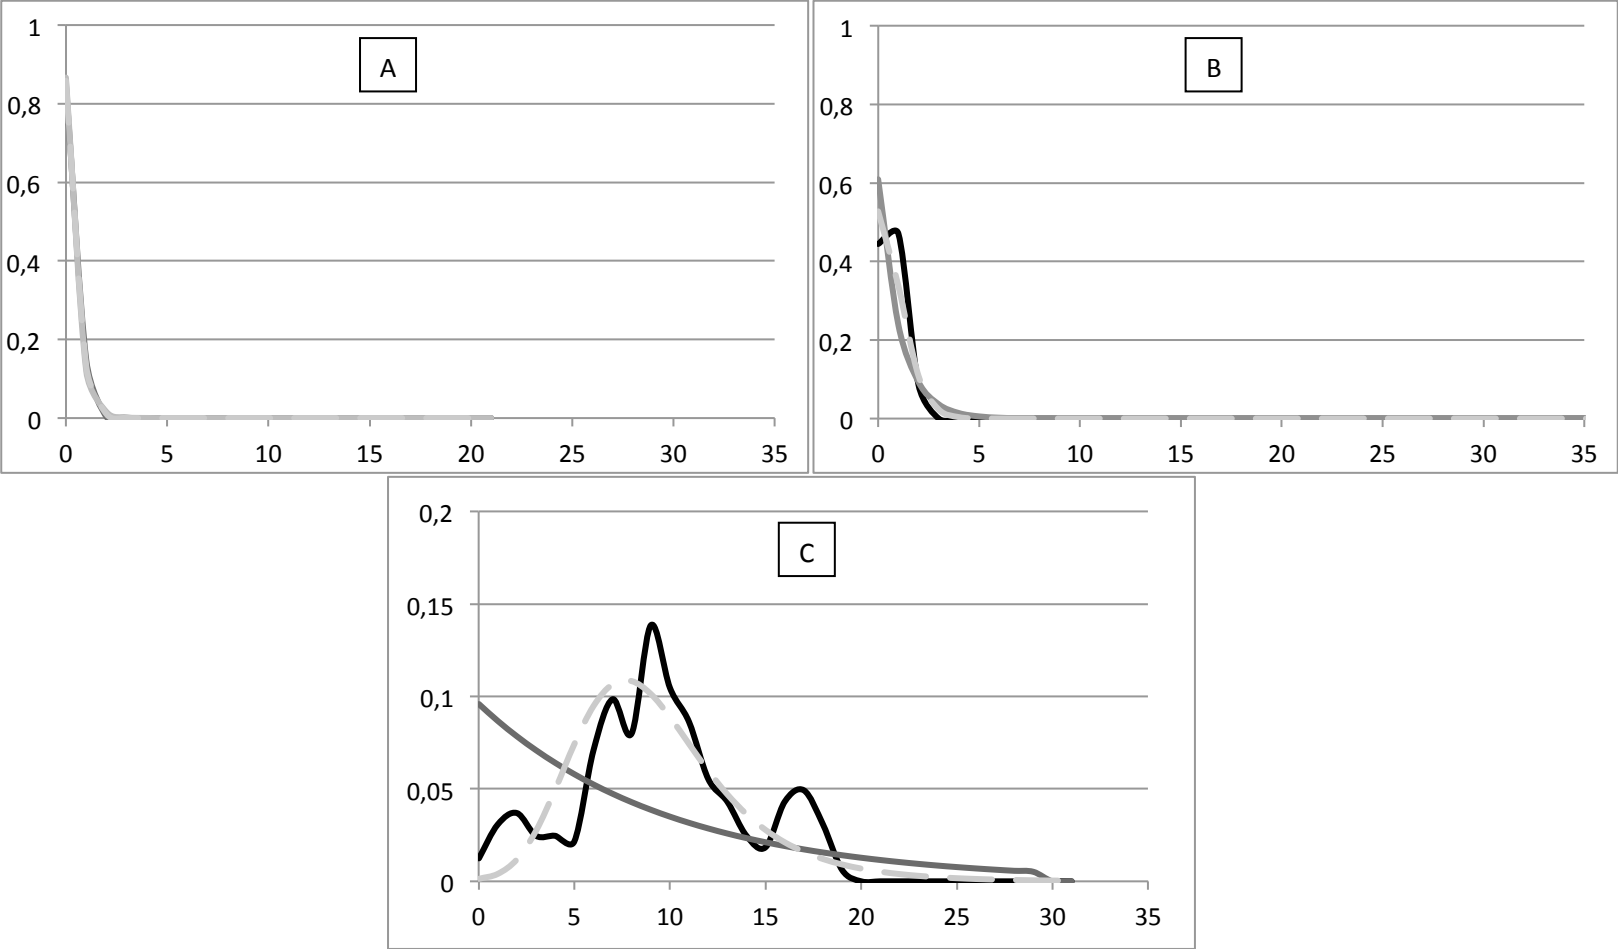

Mismatch curves for each hsp 70 locus (A paralog ; B paralog ; C paralog) for the *Euphausia superba* species. Observed frequencies follow the black line whereas theoretical values are represented by grey lines (dashed lines: constant model; no variation of the population size; continuous line: growth model; population with a growing population size).

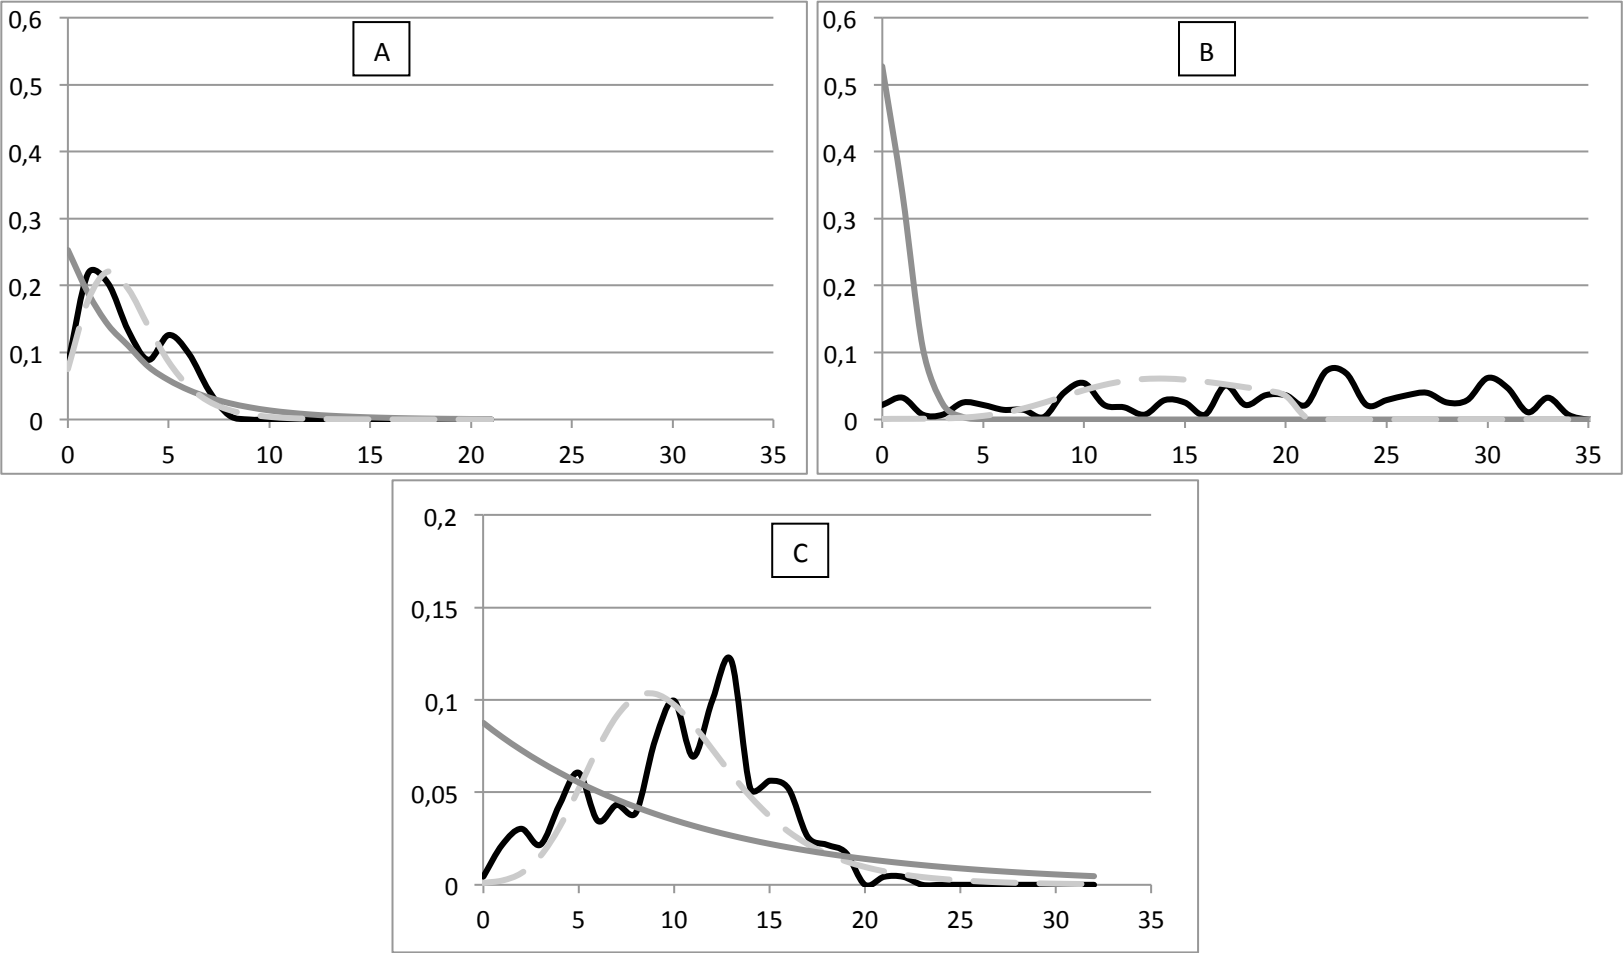

Supplement: ECE3-6-1555-s001.pdf [file ECE3-6-1555-s001.pdf]
